# Supplementary material
Source: PubMed Central journal article supplement (PMC3872536)
Supplement: NIHMS527798-supplement-1_si_001.pdf [file NIHMS527798-supplement-1_si_001.pdf]

## *Supporting Information*

# Flow-Mediated Stem Cell Labeling with Superparamagnetic Iron Oxide Nanoparticle Clusters

*Nicholas Clay<sup>a,‡</sup>, Kwanghyun Baek<sup>b,‡</sup>, Artem Shkumatov<sup>c</sup>, Mei-Hsiu Lai<sup>a</sup>, Cartney E. Smith<sup>a</sup>, Max Rich<sup>a</sup>, Hyunjoon Kong<sup>a,\*</sup>*

a—Department of Chemical and Biomolecular Engineering, b—Department of Materials Science and Engineering, c—Department of Pathobiology, University of Illinois at Urbana-Champaign, Urbana, Illinois, 61801, United States

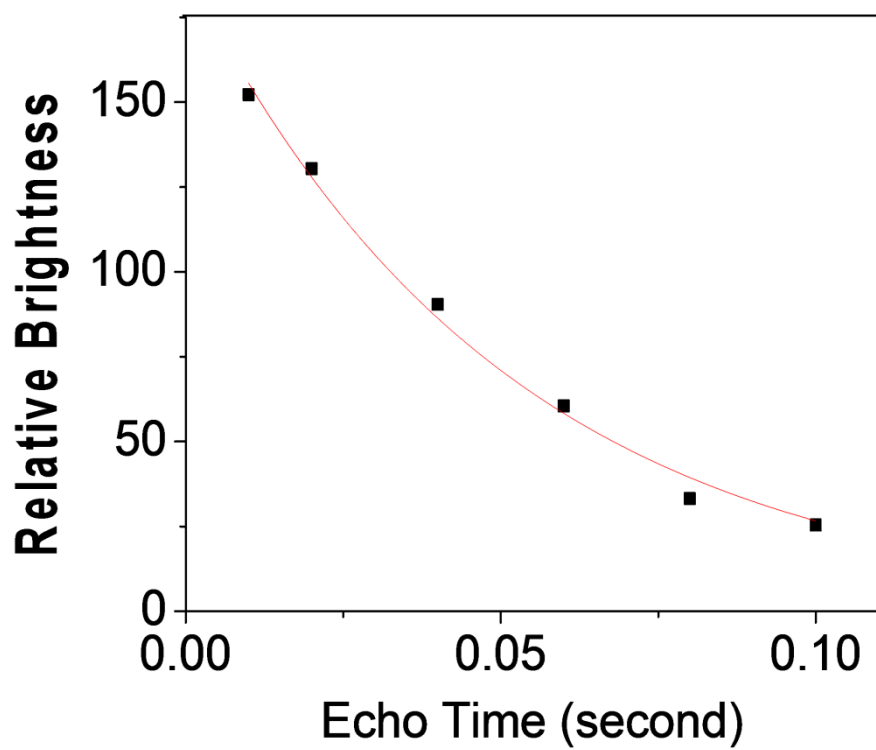

**Figure S1.** Example plot of hypointensity changes versus echo time. Exponential fit was used to calculate  $1/T_2$ .

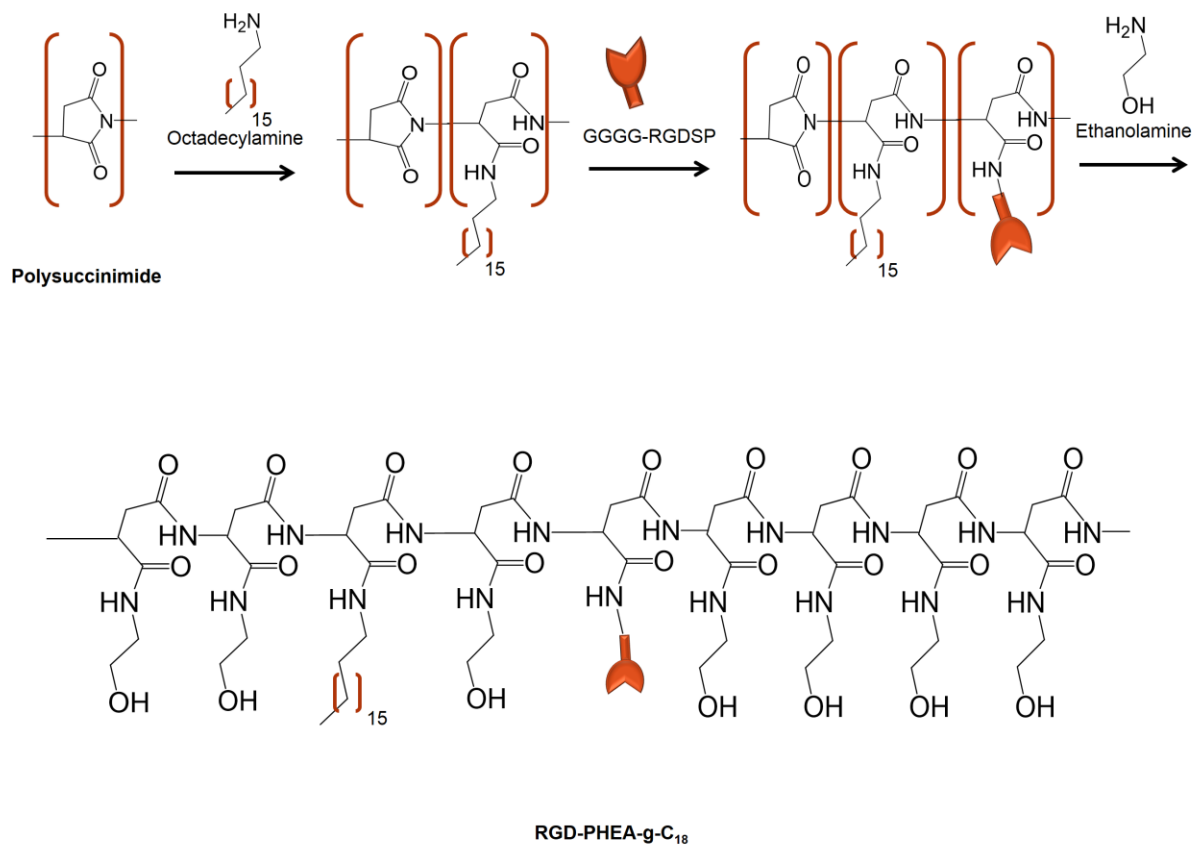

**Figure S2.** Scheme for synthesizing RGD-PHEA-g-C<sub>18</sub>.

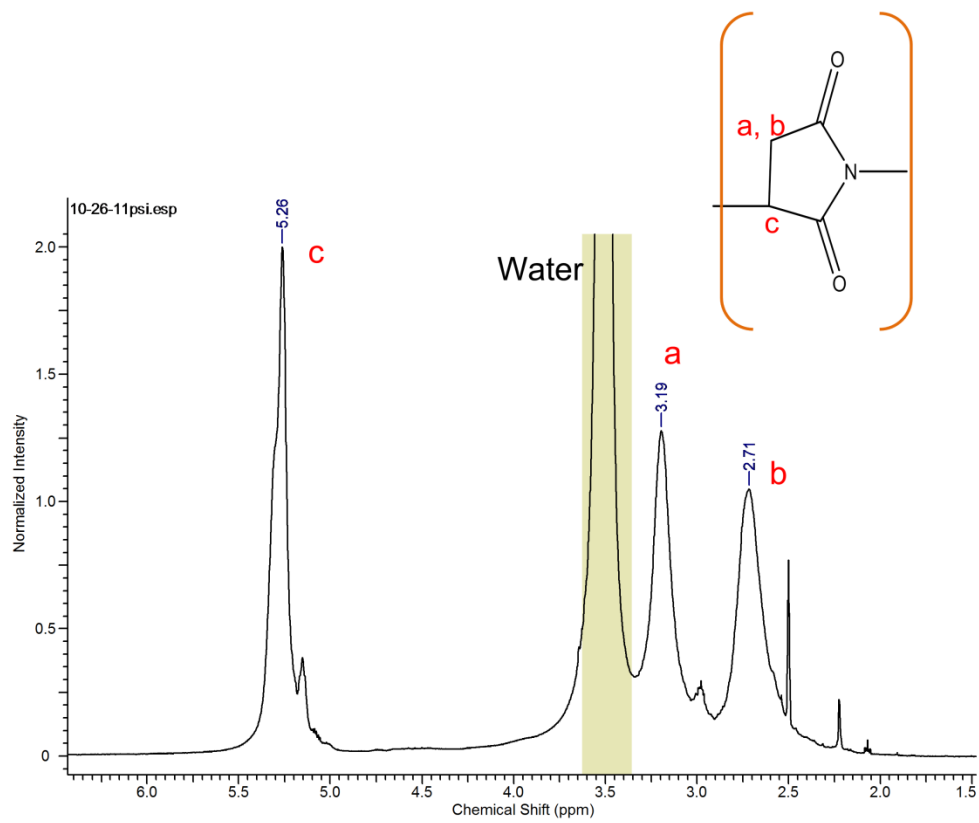

**Figure S3.** <sup>1</sup>H-NMR spectrum for polysuccinimide.

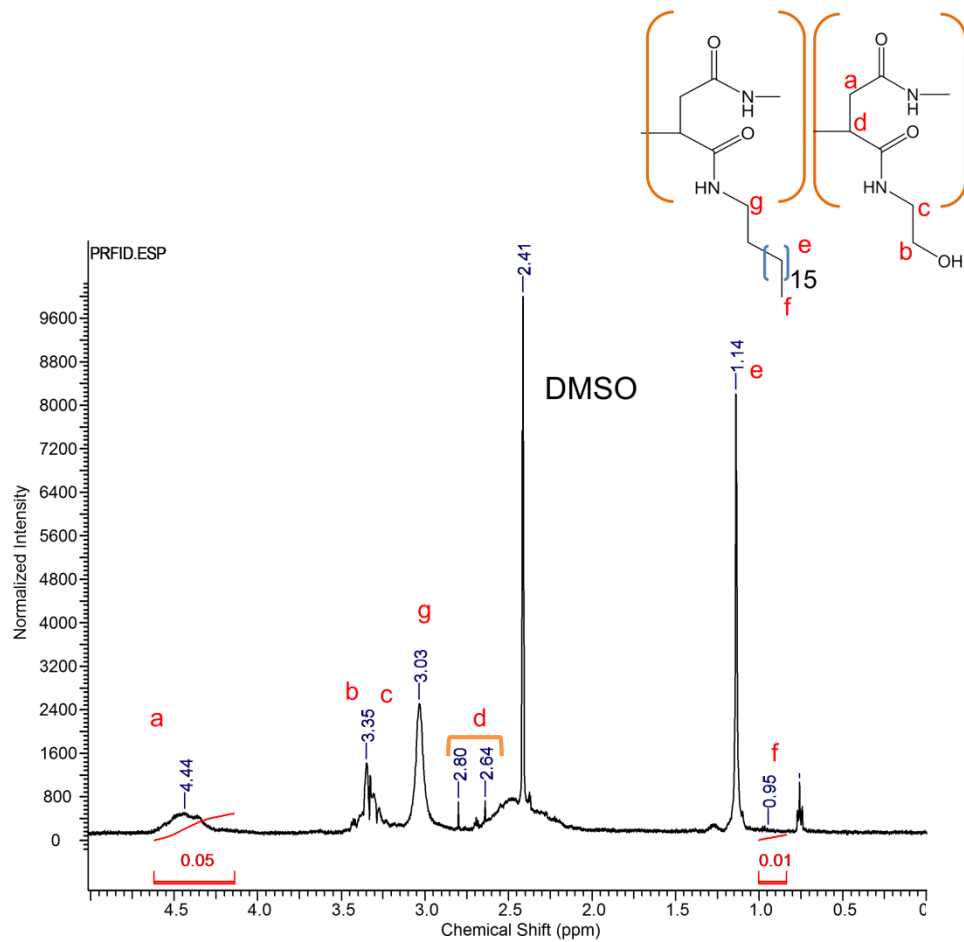

**Figure S4.**  $^1\text{H}$ -NMR spectrum for PHEA-g- $\text{C}_{18}$ .

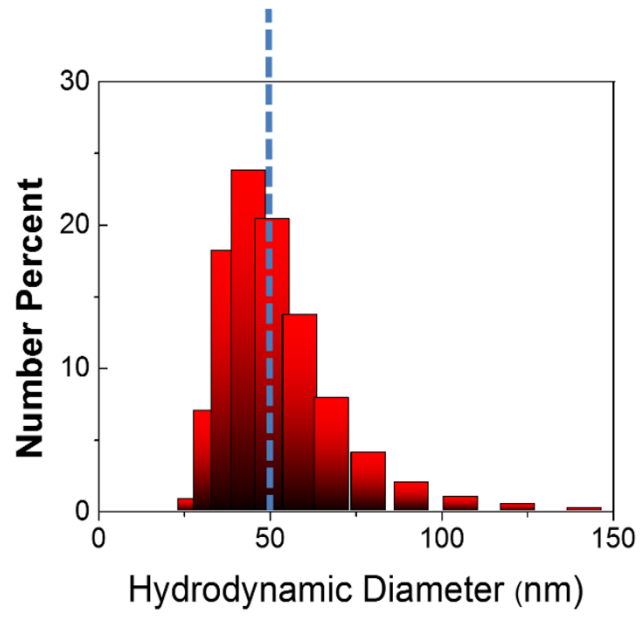

**Figure S5.** Size distribution for RGD-SPIO clusters as characterized by DLS. A blue dotted line is noted at 50 nm, which is considered the upper limit for receptor-mediated endocytosis.

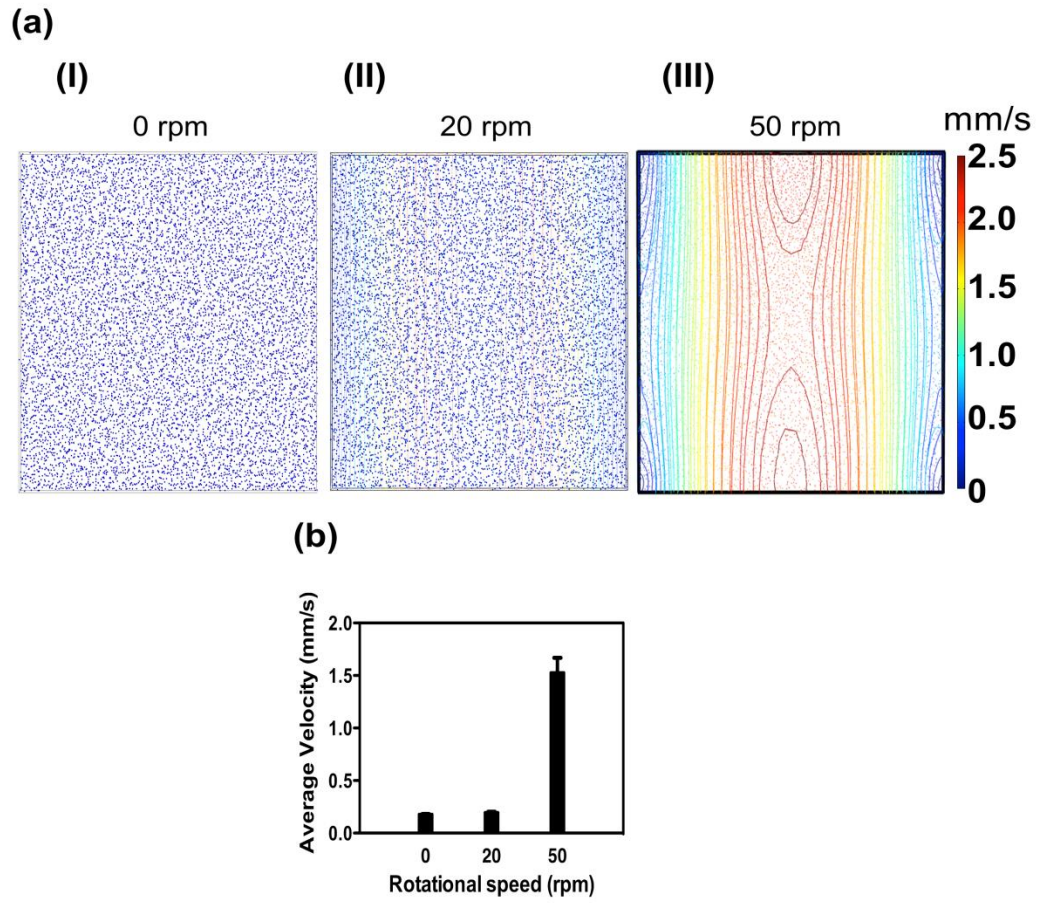

**Figure S6.** Computational analysis of particle movement in T25 culture flask. (a) Simulated particle velocity magnitude in culture plate with orbital shaking at 0 (I), 20 (II), and 50 (III) rpm, respectively. (b) Average particle velocity with different rotational speeds.

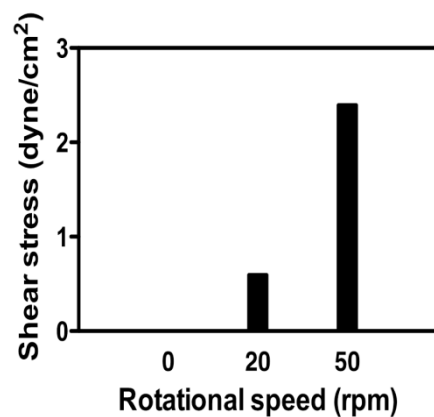

**Figure S7.** Maximum shear stress at the bottom of a T25 flask with rotational speeds.

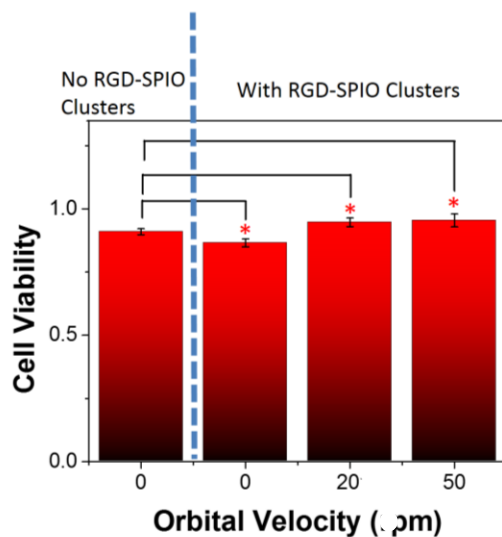

**Figure S8.** Cell viability under different orbital velocities, as quantified through Trypan Blue assay. RGD-SPIO cluster concentration was kept constant at 0.32 mM Fe. \* corresponds to  $p > 0.05$ .



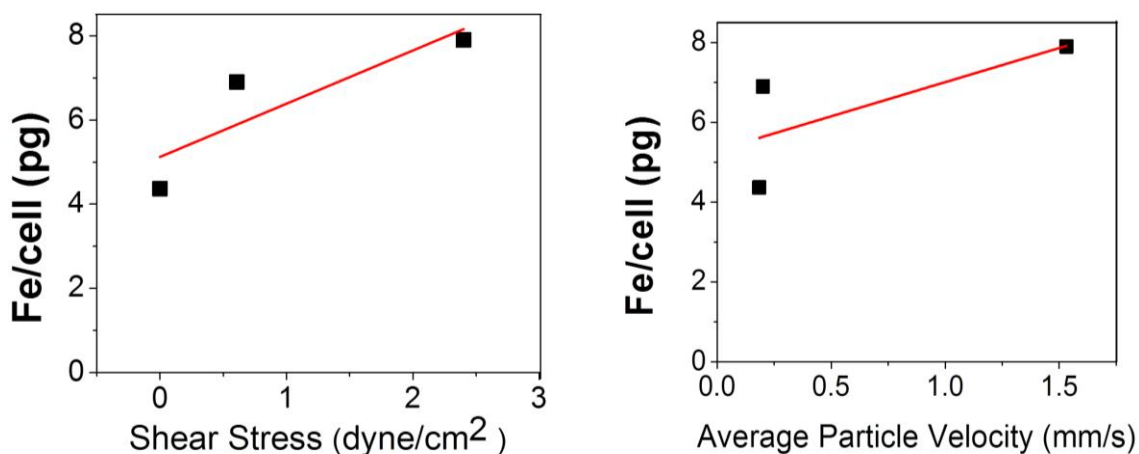

**Figure S9.** Iron content per cell correlates linearly with shear stress ( $R^2=0.75$ ). In contrast, the iron content per cell was not linearly correlated with average RGD-SPIO cluster velocity ( $R^2= 0.52$ ).

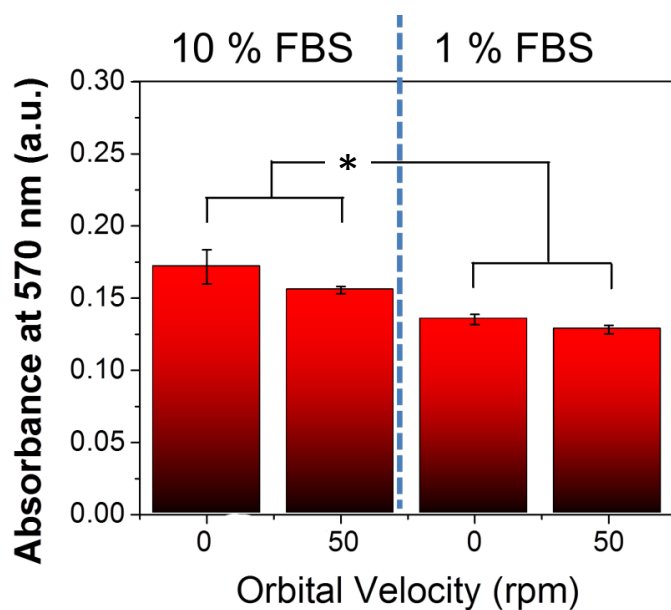

**Figure S10.** Changes in cell proliferation for different orbital velocities and FBS concentrations. Here, greater absorbance values correspond to a greater degree of metabolic activity. The difference of values between conditions is statistically significant (\* $p < 0.05$ ).
